# Supplementary material for: Preliminary Model-Based Evaluation of Water Conservation Strategies in a Semi-Arid Urban Zone
Source: MDPI journal article supplement (doi:10.3390/land11010101), 2022-01-08

# Appendix A. Supplementary Material

## Preliminary model-based evaluation of water conservation strategies in a semi-arid urban zone

Marcelino Antonio Zúñiga-Estrada, Liliana Lizárraga-Mendiola, Carlos Alfredo Bigurra-Alzati, Sergio Esteban Aldana-Alonso, Jorge Santiago Ramírez-Núñez, and Gabriela A. Vázquez-Rodríguez\*

\* Correspondence: [gvazquez@uaeh.edu.mx](mailto:gvazquez@uaeh.edu.mx)

### Contents:

Figure S1. Flow simulated in scenario A after a 39-mm storm event.

Figure S2. Volume simulated in scenario A after a 39-mm storm event.

Figure S3. Flow simulated in scenario A after a 30-mm storm event.

Figure S4. Volume simulated in scenario A after a 30-mm storm event.

Figure S5. Flow simulated in scenario A after a 9-mm storm event.

Figure S6. Volume simulated in scenario A after a 9-mm storm event.

High-resolution figures of the dynamics of the runoff generated in scenarios A (conventional urban development without LID implementation), B (urban development with LID practices), and C (realistic urban development with LID practices) 1.5 h after starting two simulated storm events: 30 mm in one day followed of 9 mm the following day, and 39 mm in one day.

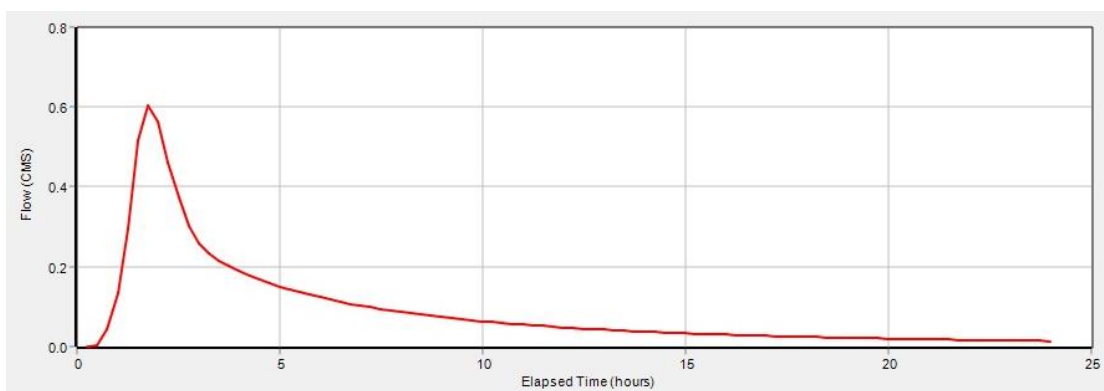

Figure S1

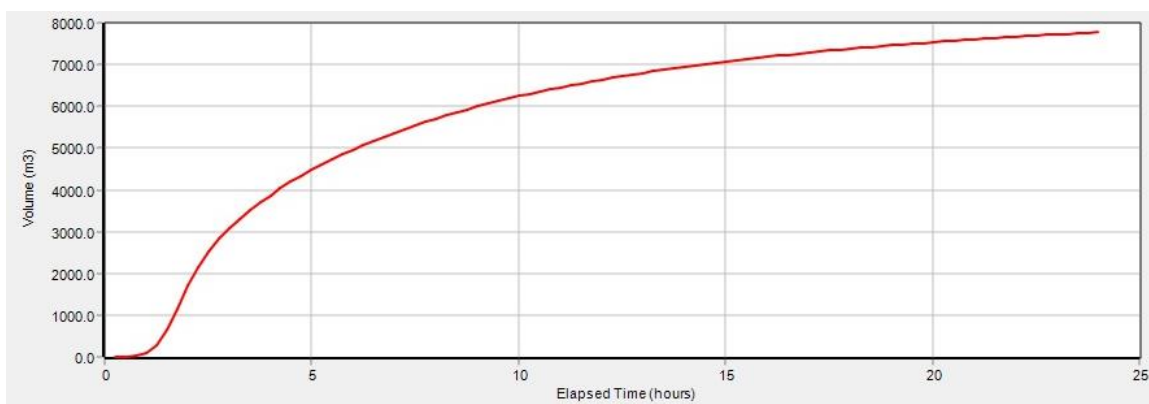

Figure S2

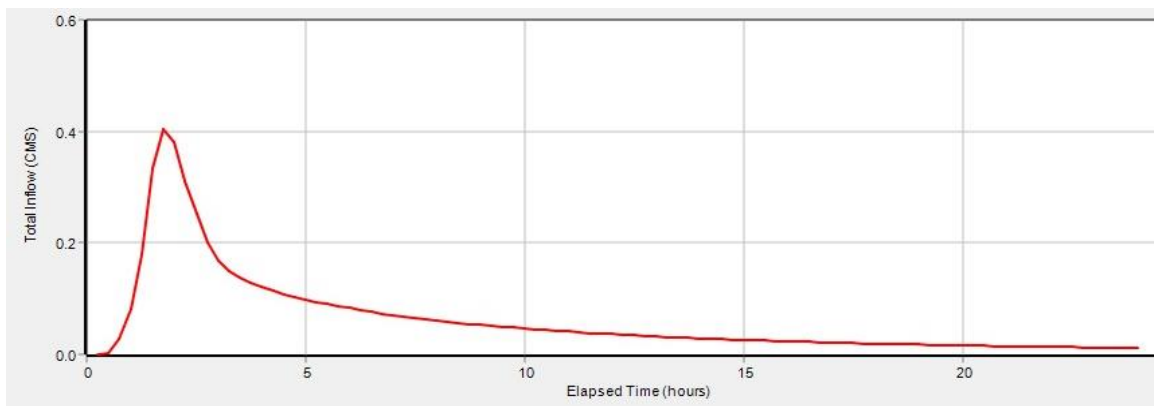

Figure S3

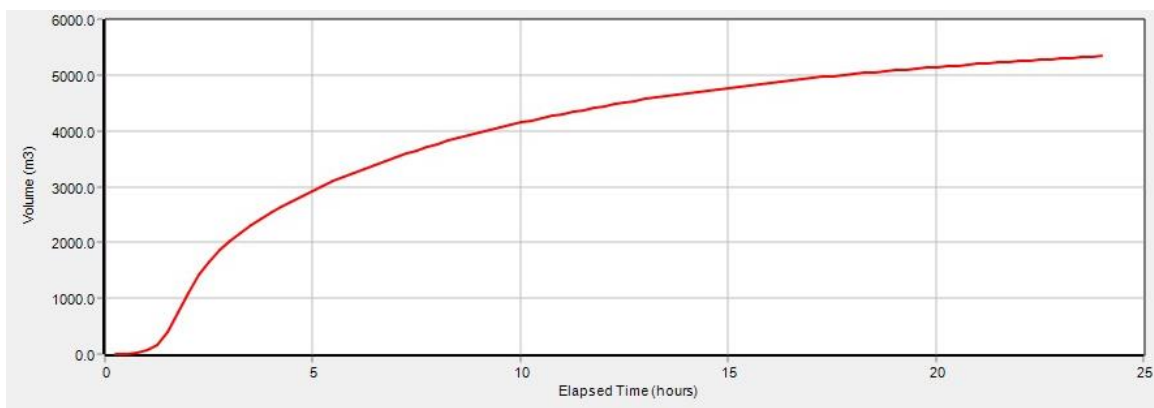

Figure S4

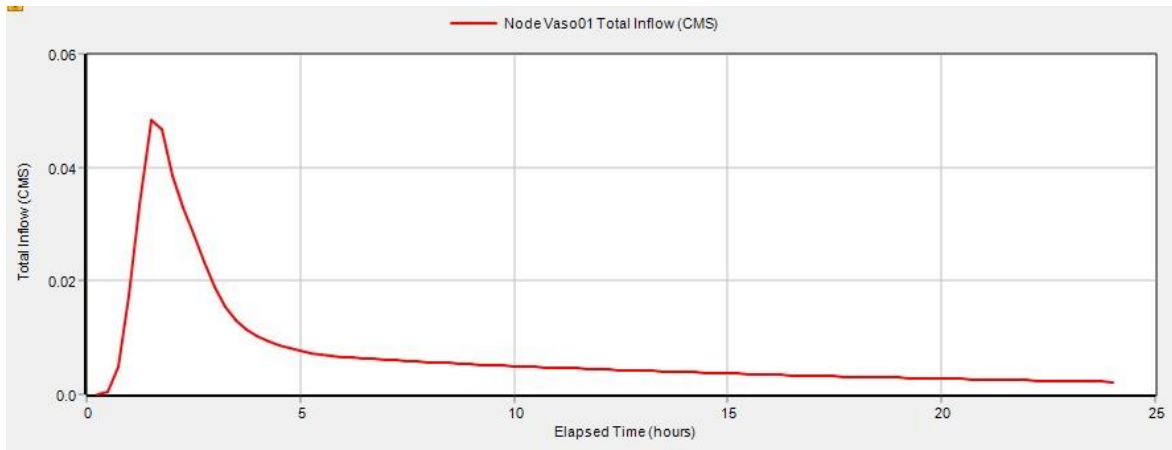

Figure S5

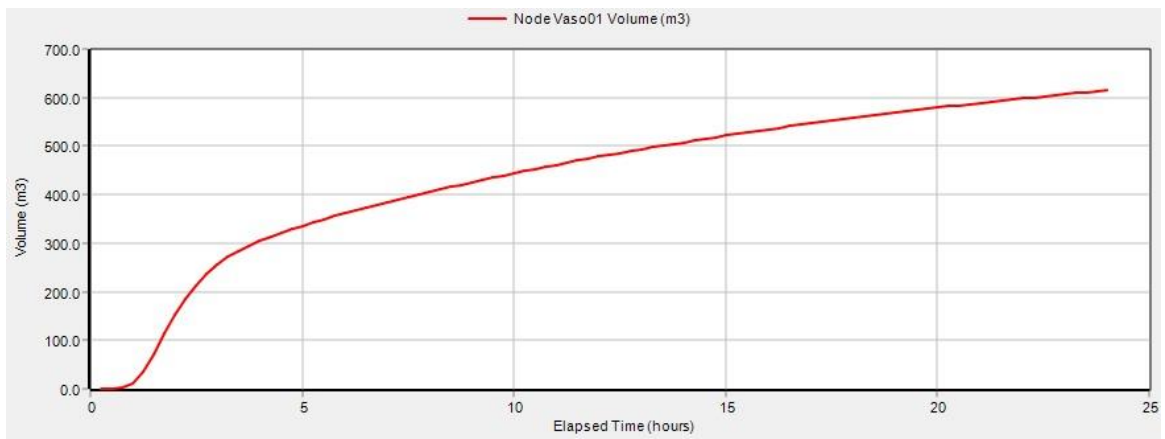

Figure S6

Study Area Map

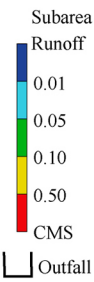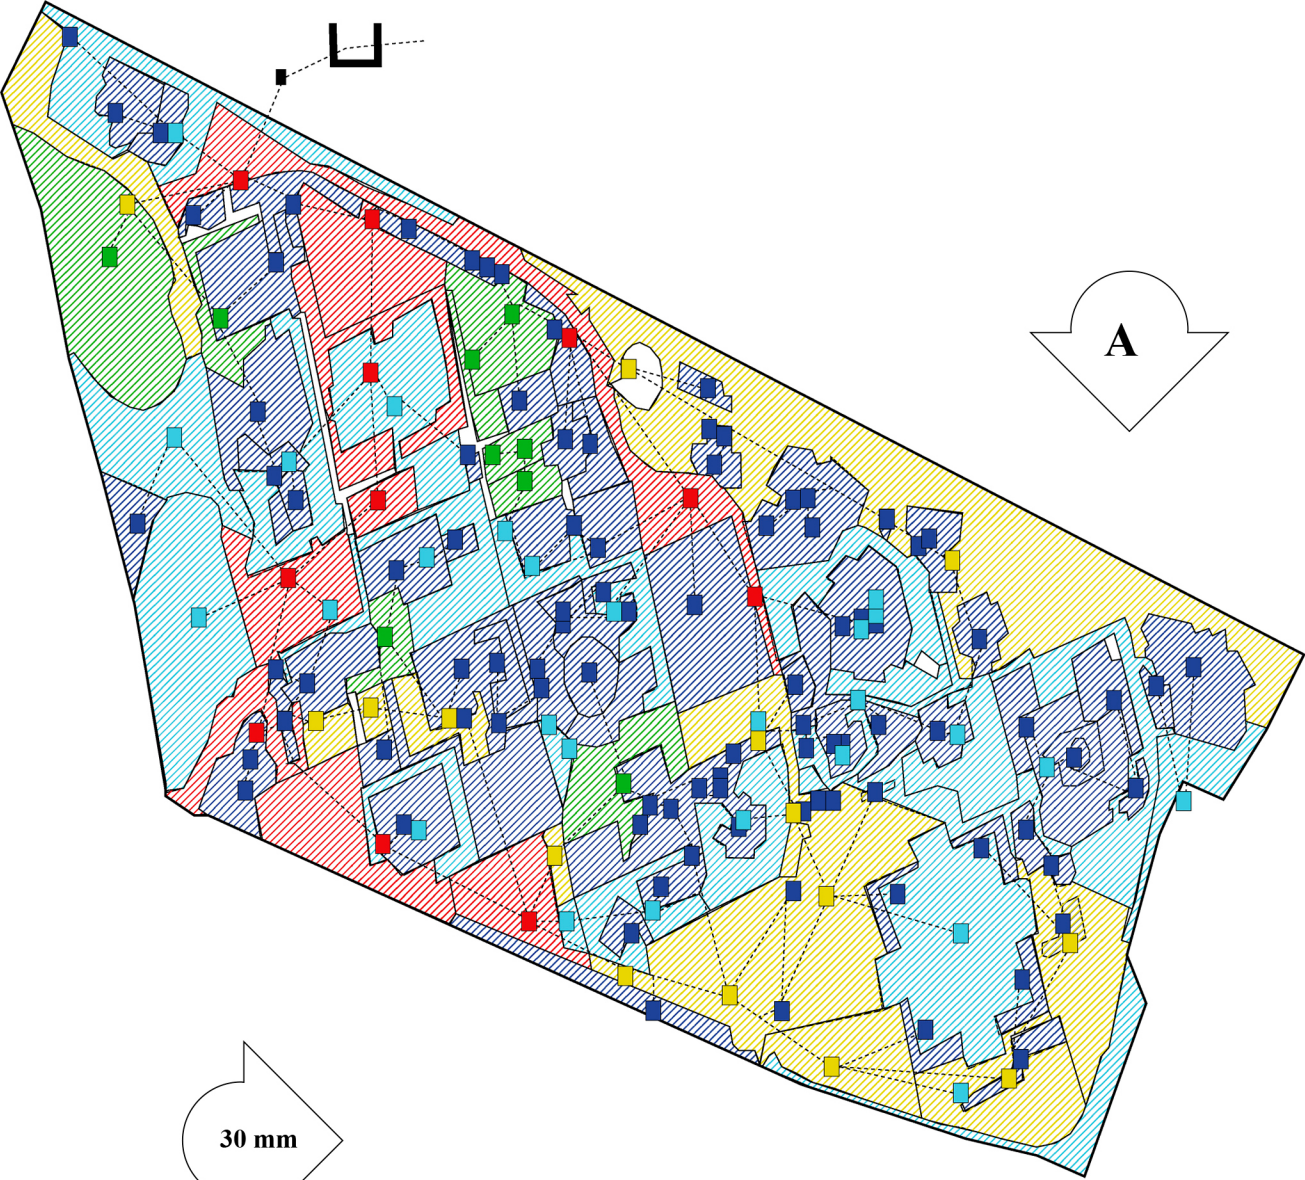

Study Area Map

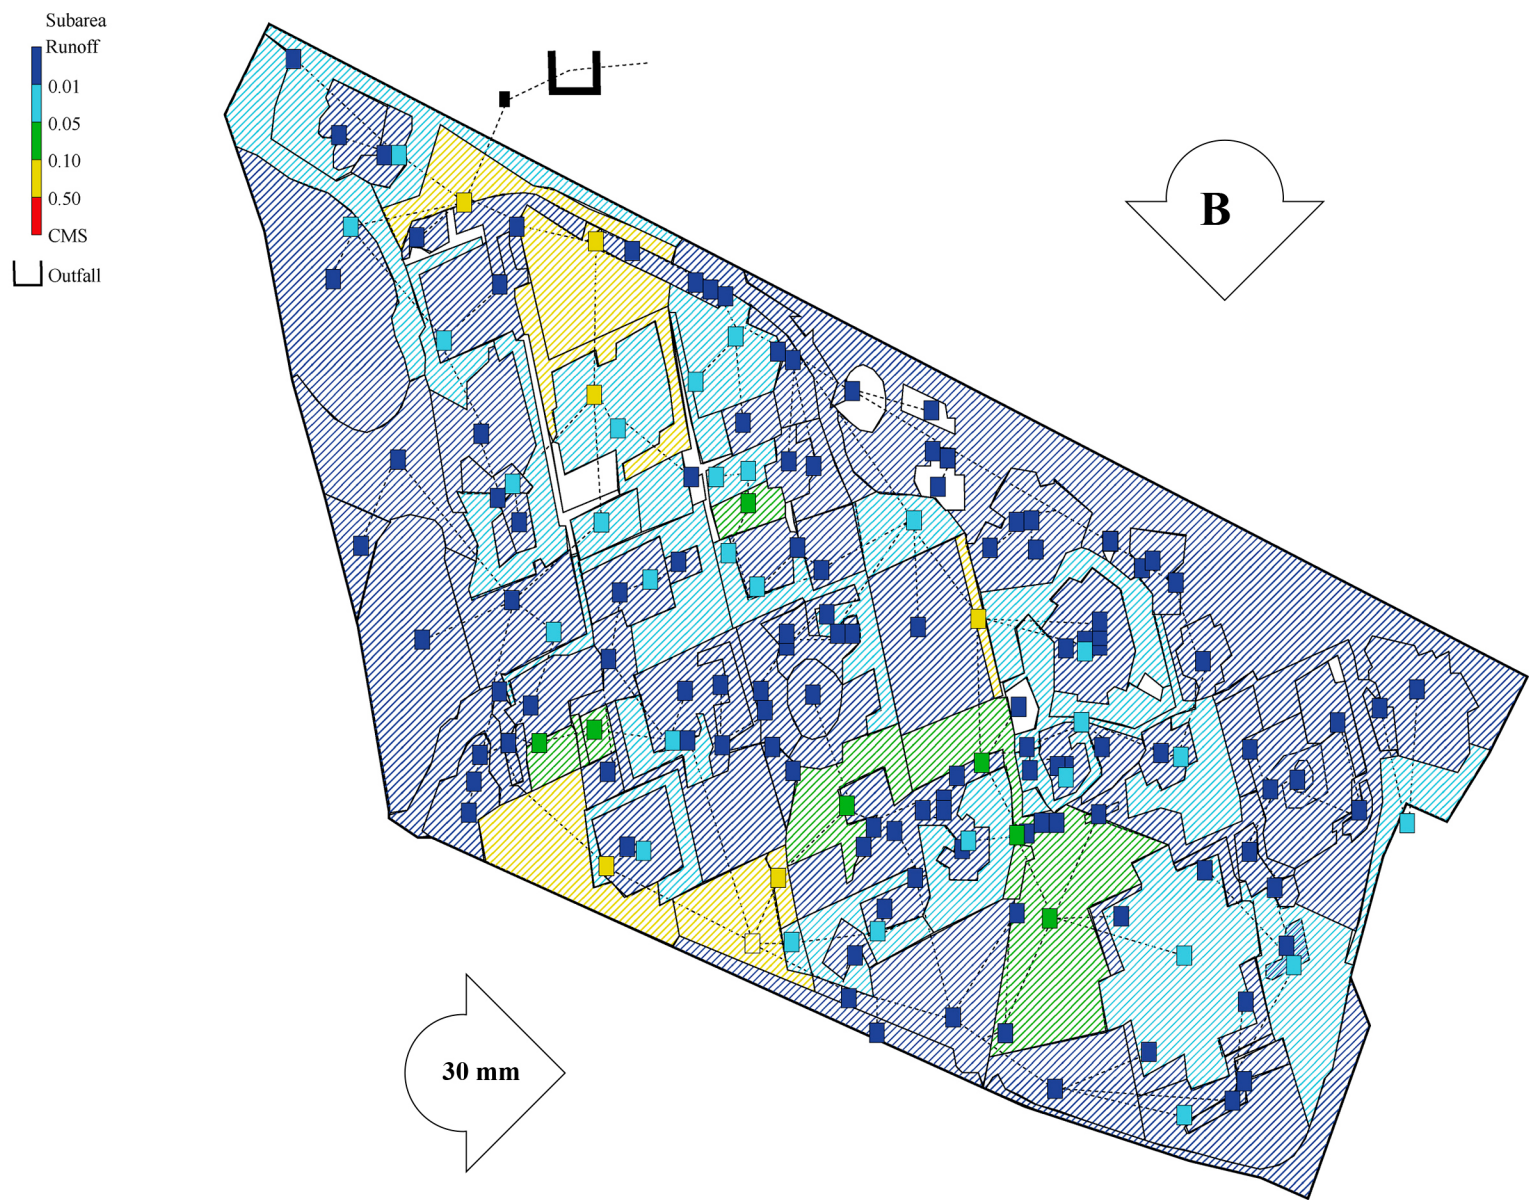

Study Area Map

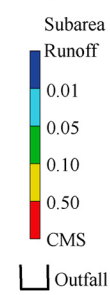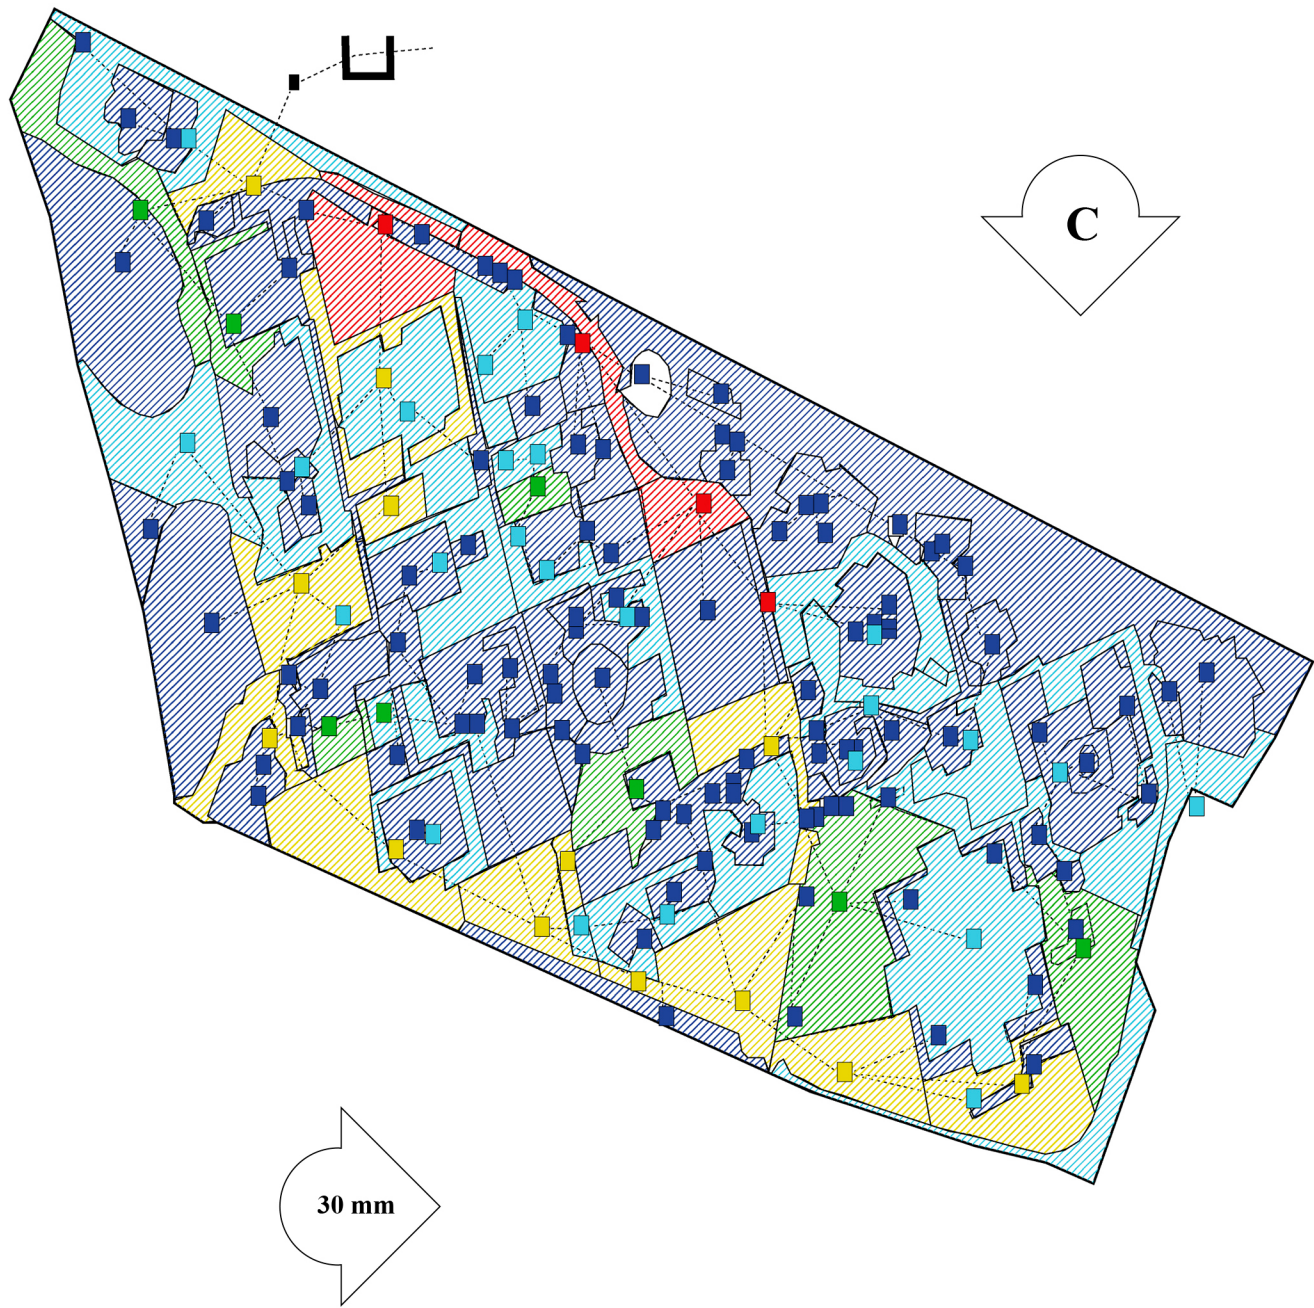

Study Area Map

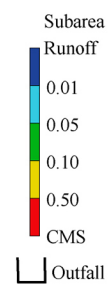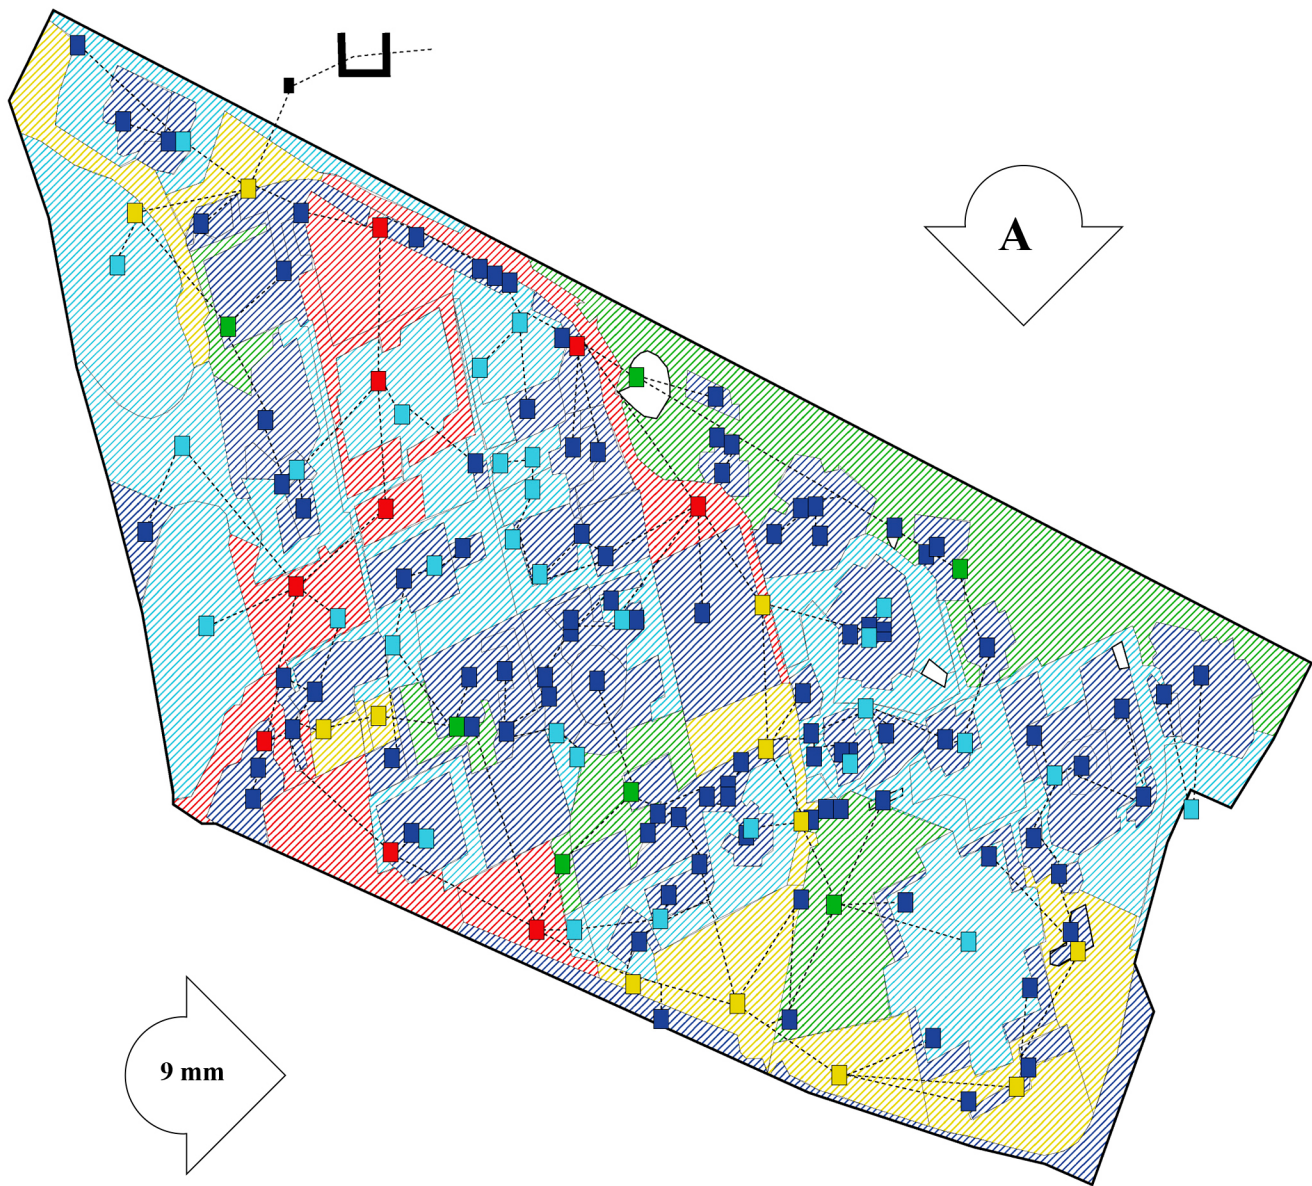

Study Area Map

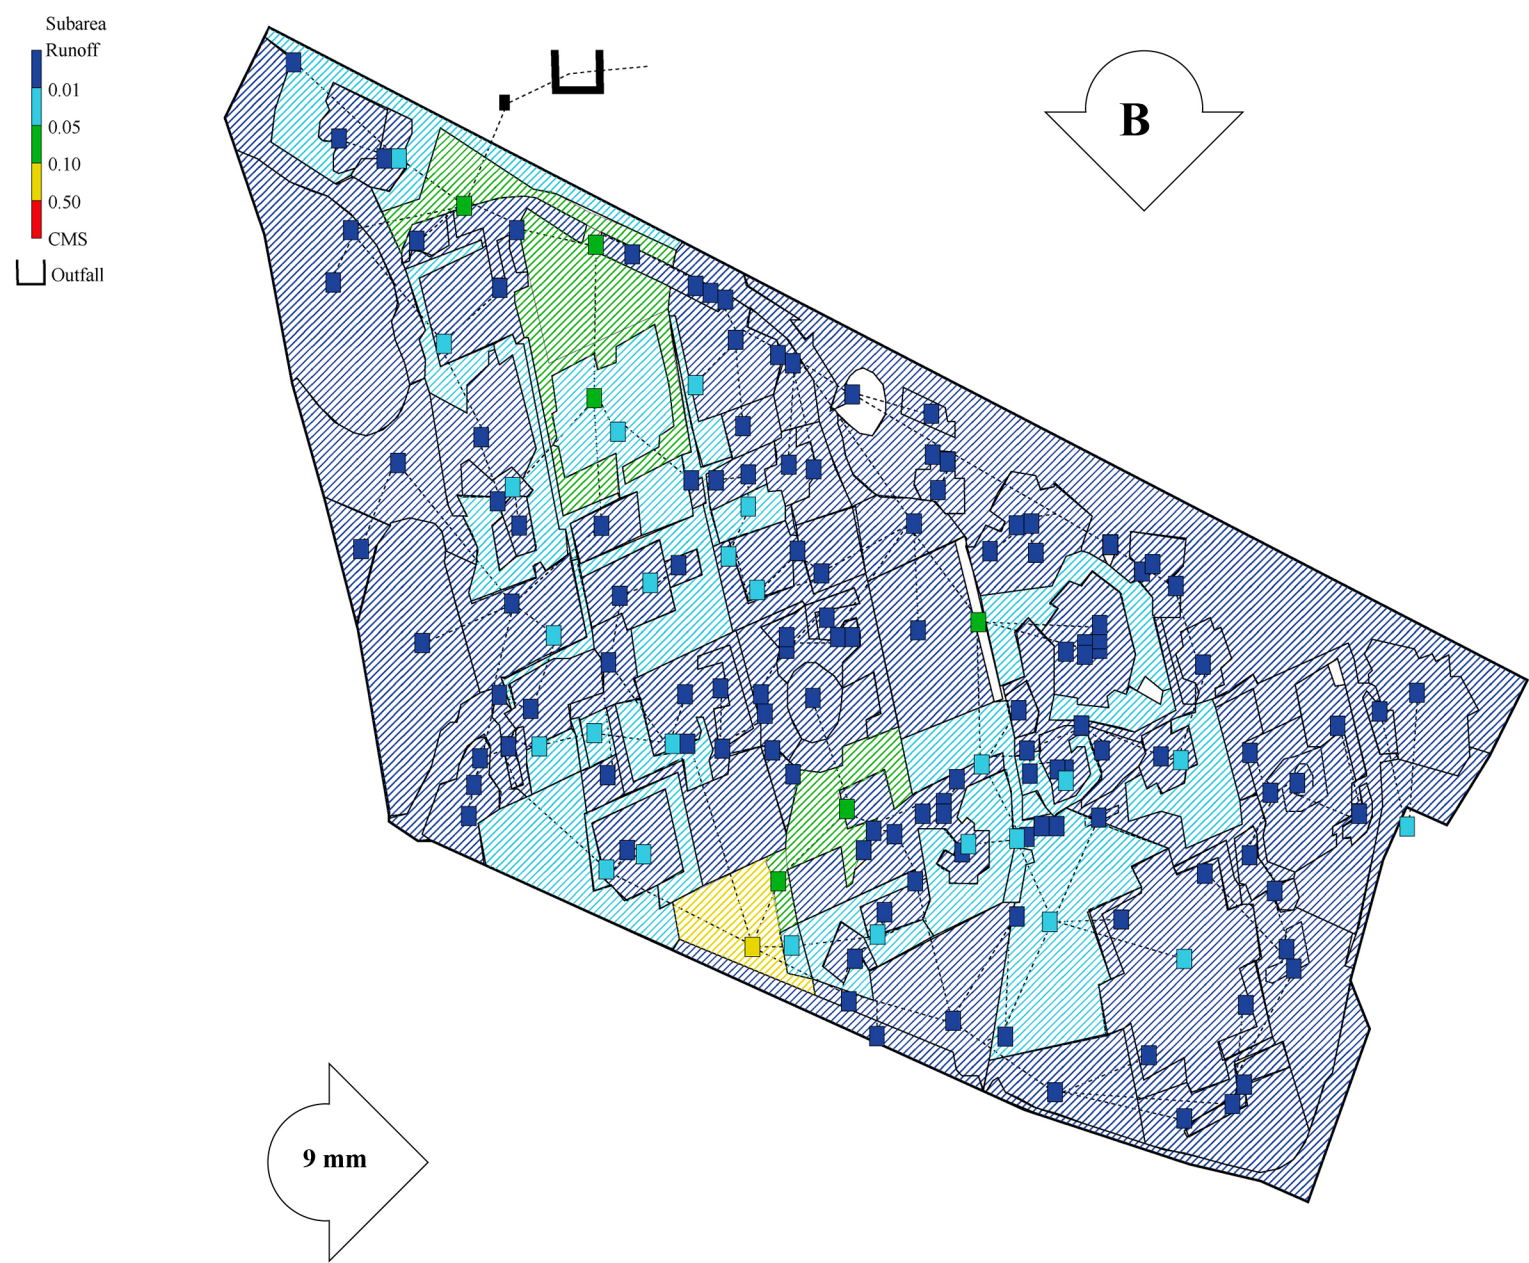

**Study Area Map**

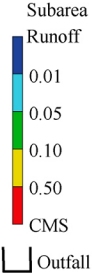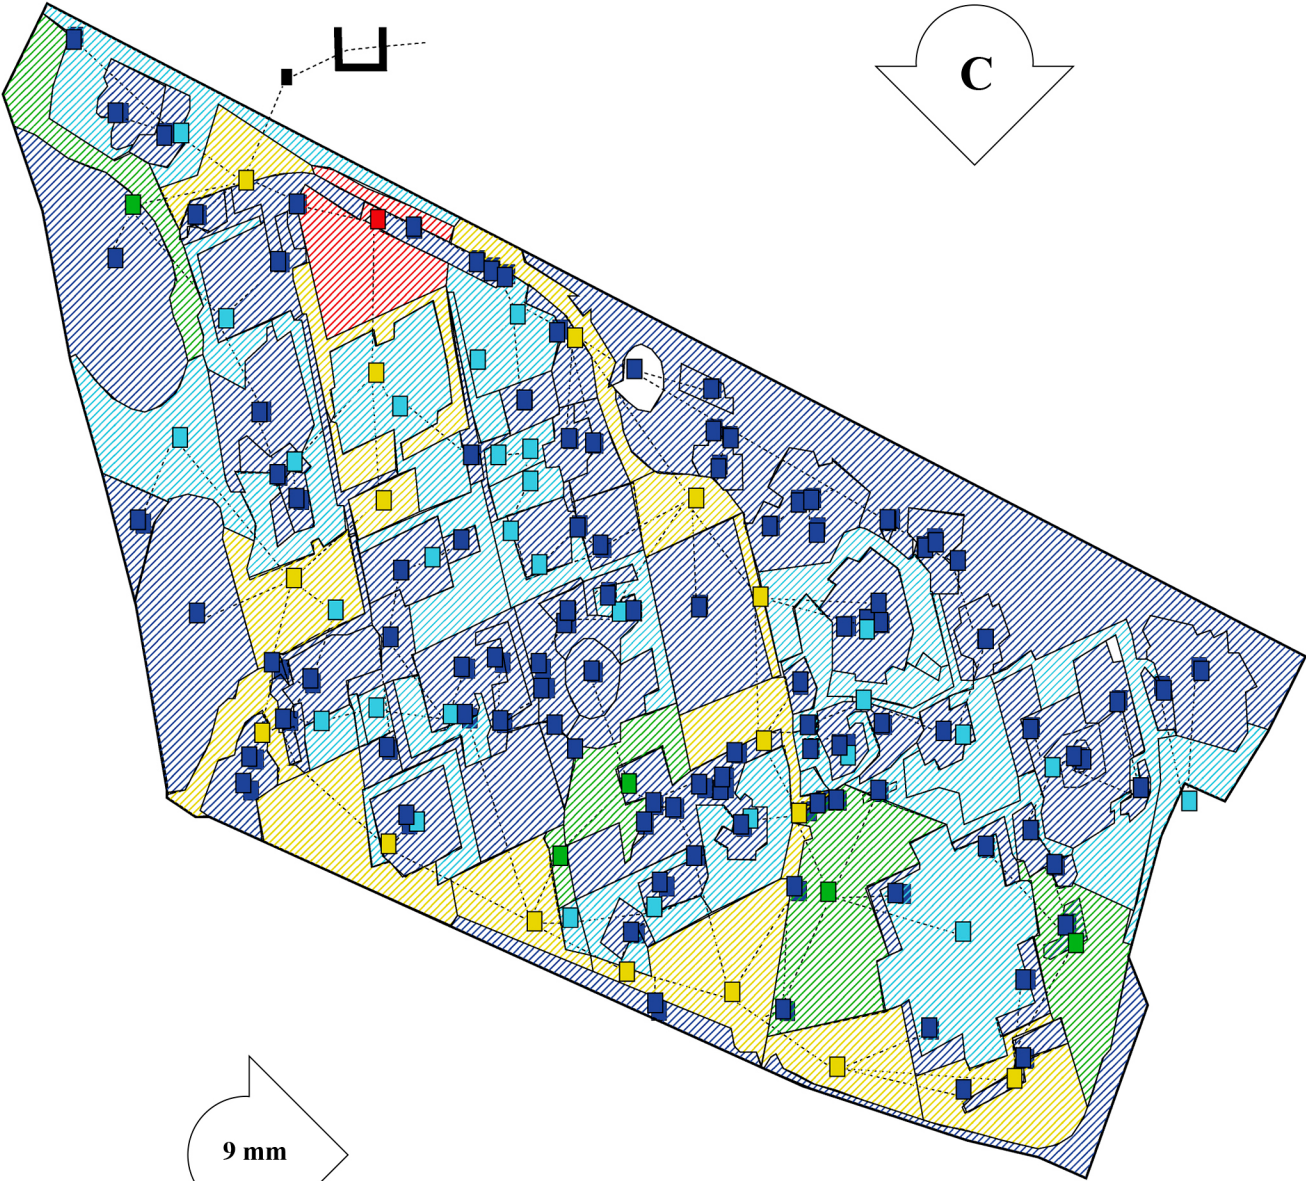

Study Area Map

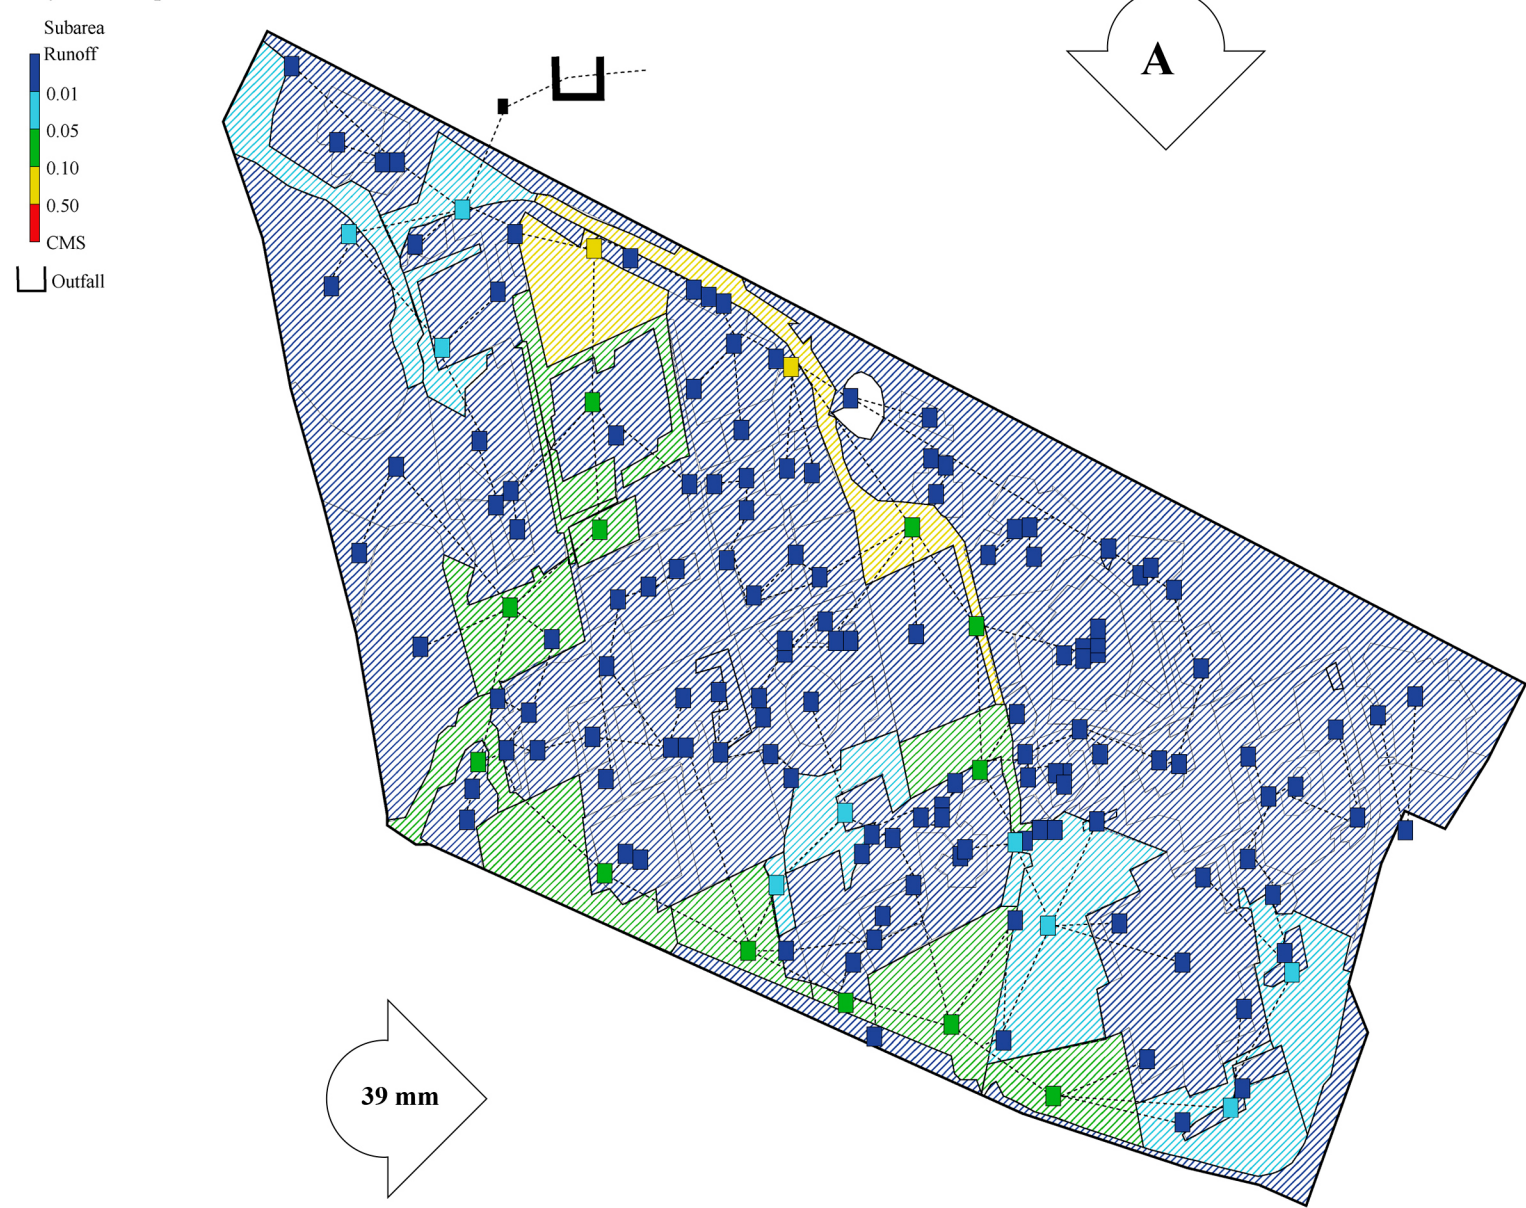

Study Area Map

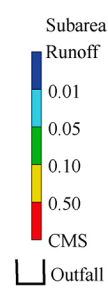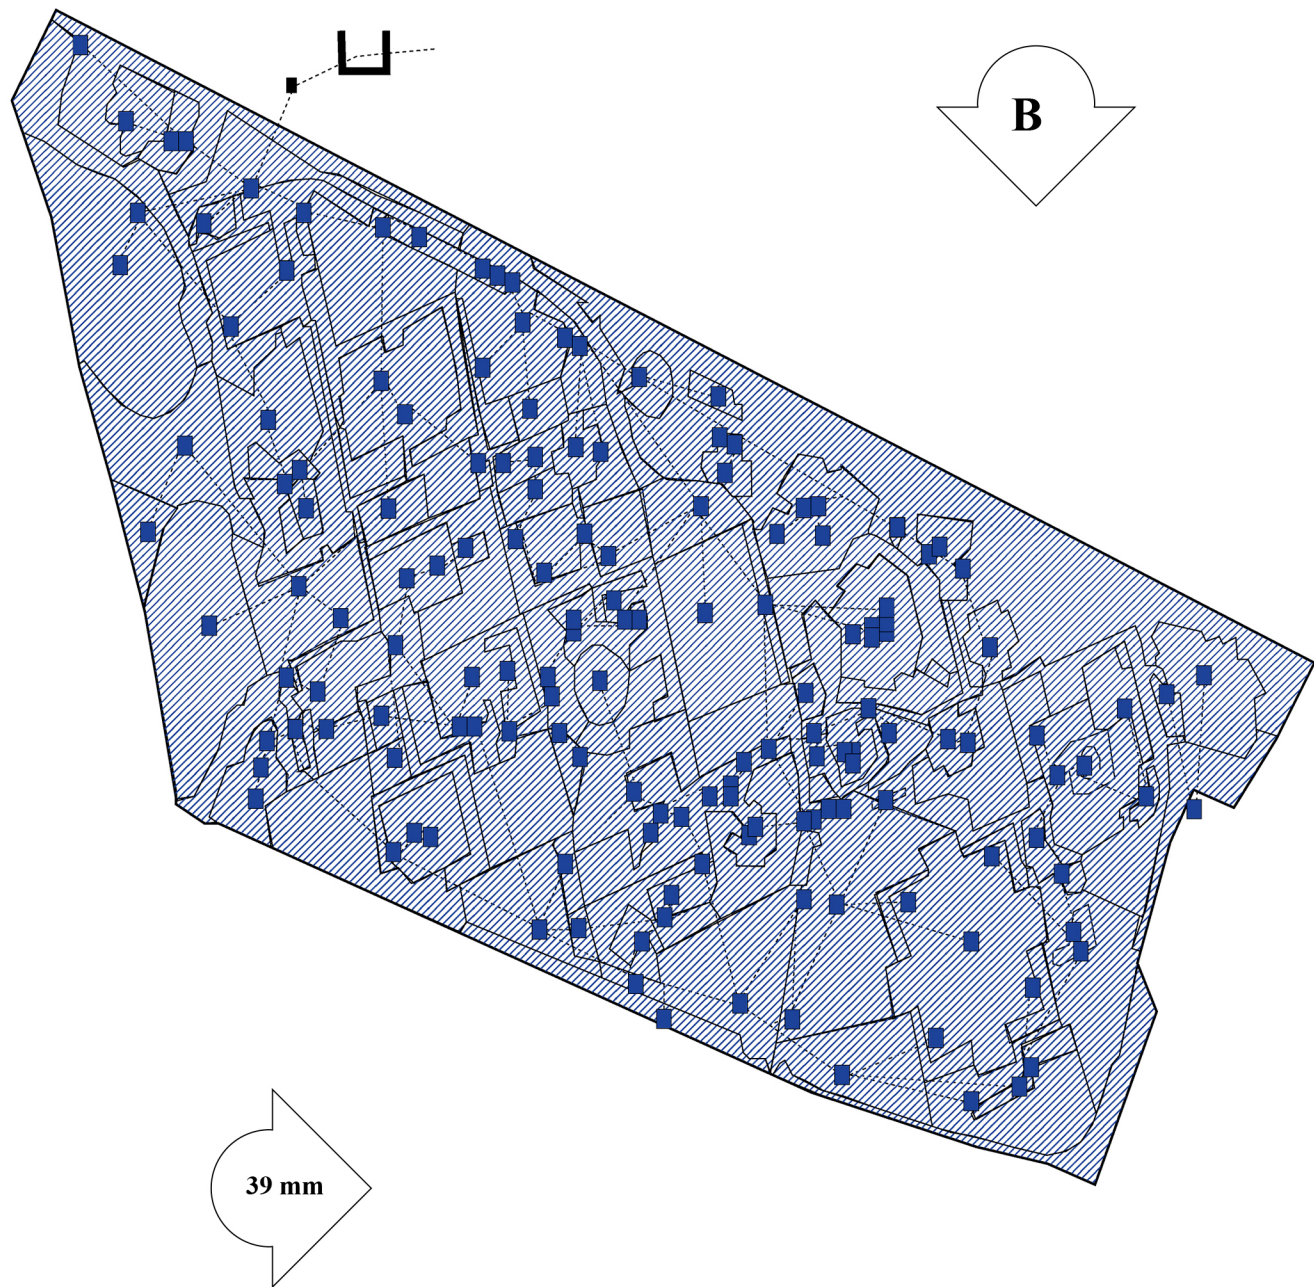

Study Area Map

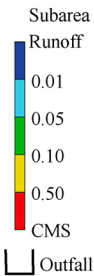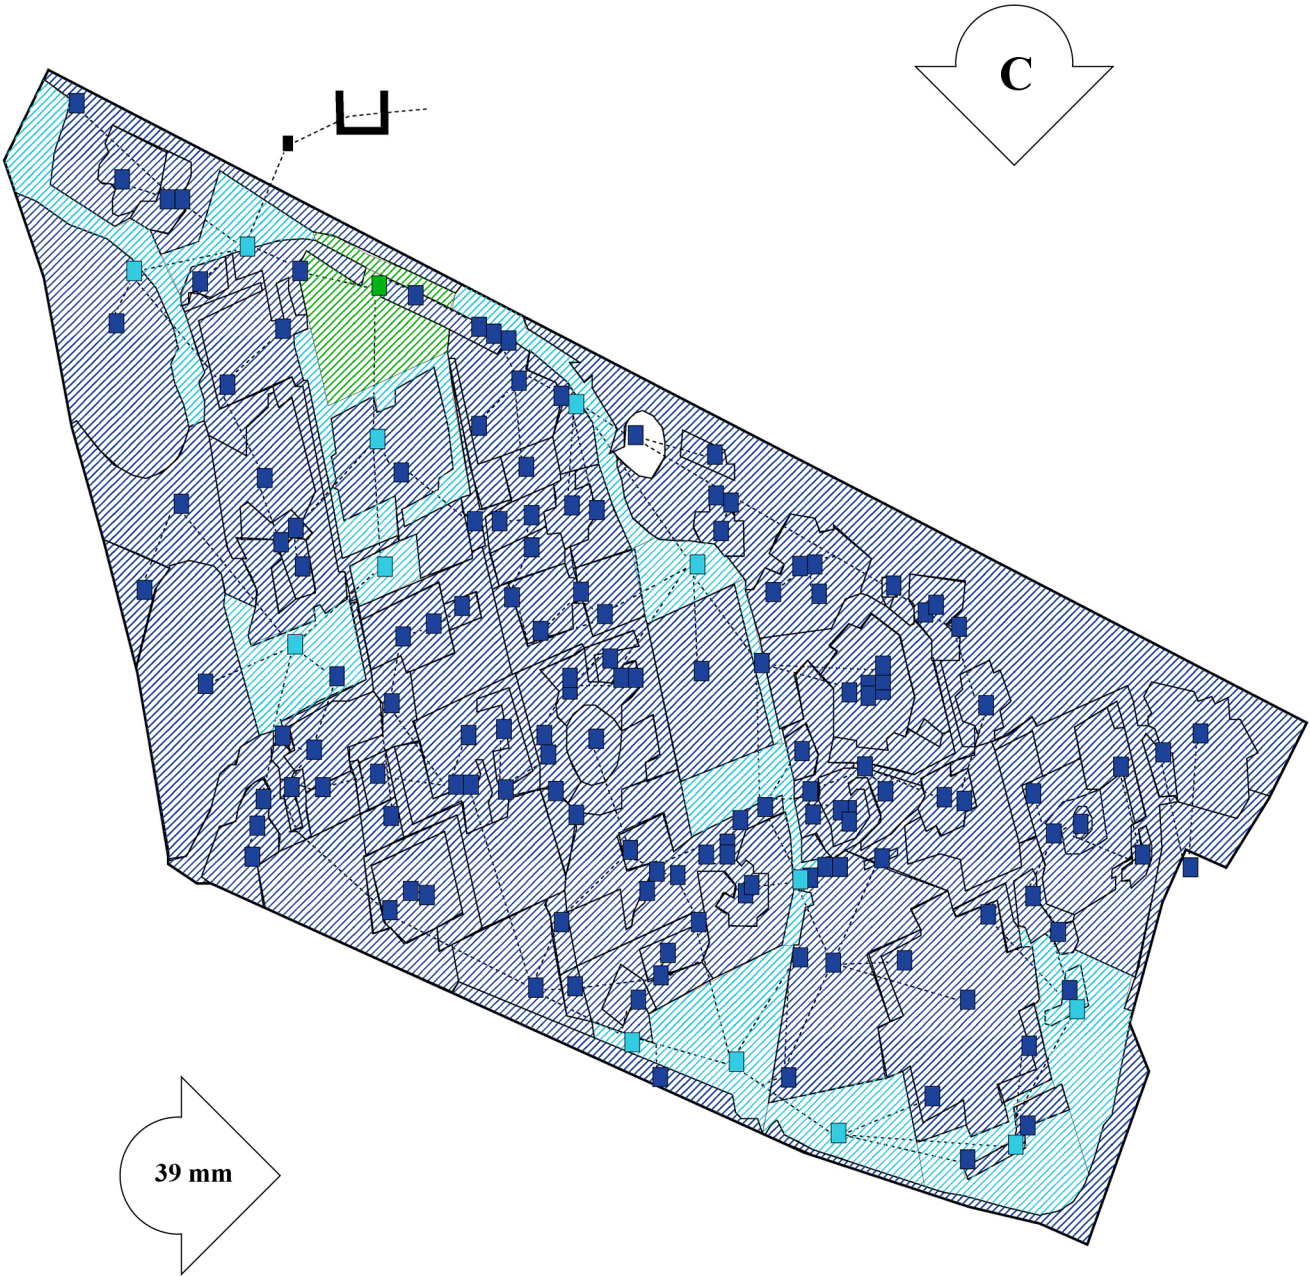

Supplement: s1 [file s1 › land-1490344-supplementary.pdf]
