# Supplementary material for: Preliminary Model-Based Evaluation of Water Conservation Strategies in a Semi-Arid Urban Zone
Source: MDPI journal article supplement (doi:10.3390/land11010101), 2022-01-08
Supplement: s1 [file s1]

Archive with 1 entries (1 files):
- land-1490344-supplementary.pdf
